# Supplementary material
Source: MDPI journal article supplement (https://www.mdpi.com/2073-445X/9/5/150)
Supplement: s1 [file s1]

1

## 2 Supplementary Materials

### 3 S1. Overview of the studies assessed in this review sorted according to reading order

| Authors                                                                                        | Title                                                                                                                                   | Journal                           | Issue | Page    | Year |
|------------------------------------------------------------------------------------------------|-----------------------------------------------------------------------------------------------------------------------------------------|-----------------------------------|-------|---------|------|
| A.F. Speak, A. Mizgajski, J. Borysiak                                                          | Allotment gardens and parks: Provision of ecosystem services with an emphasis on biodiversity                                           | Urban Forestry and Urban Greening | 14    | 772-781 | 2015 |
| A. Tiwary, P. Kumar                                                                            | Impact evaluation of green–grey infrastructure interaction on built-space integrity: An emerging perspective to urban ecosystem service | Science of Total Environment      | 487   | 350-360 | 2014 |
| Á. Takács, M. Kiss, A. Hof, E. Tanács, Á. Gulyás, N. Kántor                                    | Microclimate modification by urban shade trees – an integrated approach to aid ecosystem service based decision-making                  | Procedia Environmental Sciences   | 32    | 97-109  | 2016 |
| A. Robert, J.L. Yengué                                                                         | What ideal green spaces for the city of tomorrow, providing ecosystem services?                                                         | Procedia Engineering              | 198   | 116-126 | 2017 |
| A. Speak, F.J. Escobedo, A. Russo, S. Zerbe                                                    | An ecosystem service-disservice ratio: Using composite indicators to assess the net benefits of urban trees                             | Ecological Indicators             | 95    | 544-553 | 2018 |
| A. Clayden, T. Green, J. Hockey, M. Powell                                                     | Cutting the lawn – Natural burial and its contribution to the delivery of ecosystem services in urban cemeteries                        | Urban Forestry and Urban Greening | 33    | 99-106  | 2018 |
| A. Voigt, N. Kabisch, D. Wurster, D. Haase, J. Breuste                                         | Structural Diversity: A Multi-dimensional Approach to Assess Recreational Services in Urban Parks                                       | AMBIO                             | 43    | 480-491 | 2014 |
| F. Baró, D. Haase, E. Gómez-Baggethun, N. Frantzeskaki,                                        | Mismatches between ecosystem services supply and demand in urban areas: A quantitative assessment in five European cities.              | Ecological Indicators             | 55    | 146-158 | 2015 |
| C.M.V.B. Almeida, M.V. Mariano, F. Agostinho, G.Y. Liu, B.F. Giannetti                         | Exploring the potential of urban park size for the provision of ecosystem services to urban centres: a case study in São Paulo, Brazil  | Building and Environment          | 144   | 450-458 | 2018 |
| C.M.V.B. Almeida, M.V. Mariano, F. Agostinho, G.Y. Liu, Z.F. Yang, L. Coscieme, B.F. Giannetti | Comparing costs and supply of supporting and regulating services provided by urban parks at different spatial scales                    | Ecosystem Services                | 30    | 236-247 | 2017 |
| C. Pueffel, D. Haase, J.A. Priess                                                              | Mapping ecosystem services on brownfields in Leipzig, Germany                                                                           | Ecosystem Services                | 30    | 73-85   | 2018 |
| C. Zhao, H.A. Sander                                                                           | Assessing the sensitivity of urban ecosystem service maps to input spatial data resolution and method choice                            | Landscape and Urban Planning      | 175   | 11-22   | 2018 |

|                                                                                                                                      |                                                                                                                                                           |                                               |       |                 |      |
|--------------------------------------------------------------------------------------------------------------------------------------|-----------------------------------------------------------------------------------------------------------------------------------------------------------|-----------------------------------------------|-------|-----------------|------|
| C. Mak, M. Scholz, P. James                                                                                                          | Sustainable drainage system site assessment method using urban ecosystem services                                                                         | Urban Ecosystems                              | 20    | 293-307         | 2017 |
| D. Johnson, S. Geisendorf                                                                                                            | Are Neighborhood-level SUDS Worth it? An Assessment of the Economic Value of Sustainable Urban Drainage System Scenarios Using Cost-Benefit Analyses      | Ecological Economics                          | 158   | 194-205         | 2019 |
| D. Wurster, M. Artmann                                                                                                               | Development of a Concept for Non-monetary Assessment of Urban Ecosystem Services at the Site Level                                                        | AMBIO                                         | 43    | 454-465         | 2014 |
| D.J. Nowak, D.E. Crane, J.C. Stevens, R.E. Hoehn, J.T. Walton, J. Bond                                                               | A Ground-Based Method of Assessing Urban Forest Structure and Ecosystem Services                                                                          | Arboriculture and Urban Forestry              | 34(6) | 347-358         | 2008 |
| D.A. Shoemaker, T.K. BenDor, R.K. Meentemeyer                                                                                        | Anticipating trade-offs between urban patterns and ecosystem service production: Scenario analyses of sprawl alternatives for a rapidly urbanizing region | Computers, Environment and Urban Systems      | 74    | 114-125         | 2019 |
| E. Pedersen, S.E.B. Weisner, M. Johansson                                                                                            | Wetland areas' direct contributions to residents' well-being entitle them to high cultural ecosystem values                                               | Science of Total Environment                  | 646   | 1315-1326       | 2019 |
| F. Marando, E. Salvatori, A. Sebastiani, L. Fusaro, F. Manes                                                                         | Regulating Ecosystem Services and Green Infrastructure: assessment of Urban Heat Island effect mitigation in the municipality of Rome, Italy              | Ecological Modelling                          | 392   | 92-102          | 2019 |
| F. Sun, J. Xiang, Y. Tao, C. Tong, Y. Che                                                                                            | Mapping the social values for ecosystem services in urban green spaces: Integrating a visitor-employed photography method into SolVES                     | Urban Forestry and Urban Greening             | 38    | 105-113         | 2019 |
| F. Baro, L. Chaparro, E. Gomez-Baggethun, J. Langemeyer, D.J. Nowak, J. Terradas                                                     | Contribution of Ecosystem Services to Air Quality and Climate Change Mitigation Policies: The Case of Urban Forests in Barcelona, Spain                   | AMBIO                                         | 43    | 466-479         | 2014 |
| F. Bottalico, G. Chirici, F. Giannetti, A. De Marco, S. Nocentini, E. Paoletti, F. Salbitano, G. Sanesi, C. Serenelli, D. Travaglini | Air pollution removal by green infrastructures and urban forests in the city of Florence                                                                  | Agriculture and Agricultural Science Procedia | 8     | 243-251         | 2016 |
| G. Cetinkaya Cifcioglu, A. Aydin                                                                                                     | Urban ecosystem services delivered by green open spaces: an example from Nicosia City in North Cyprus                                                     | Environmental Monitoring and Assessment       | 10    | Article No. 190 | 2018 |
| H. Ko, Y. Son                                                                                                                        | Perceptions of cultural ecosystem services in urban green spaces: A case study in Gwacheon, Republic of Korea                                             | Ecological Indicators                         | 91    | 299-306         | 2018 |

|                                                                                                                    |                                                                                                                                                                        |                                           |        |         |      |
|--------------------------------------------------------------------------------------------------------------------|------------------------------------------------------------------------------------------------------------------------------------------------------------------------|-------------------------------------------|--------|---------|------|
| H. Zepp, A. Mizgajski, C. Mess, I. Zwierzchowska,                                                                  | A Preliminary Assessment of Urban Ecosystem Services in Central European Urban areas. A Methodological Outline with Examples from Bochum (Germany) and Poznań (Poland) | Berichte. Geographie und Landeskunde.     | 90(1)  | 67-84   | 2016 |
| H.-F. Wang, S. Qureshi, S. Knapp, C.R. Friedman                                                                    | A basic assessment of residential plant diversity and its ecosystem services and disservices in Beijing, China                                                         | Applied Geography                         | 64     | 121-131 | 2015 |
| I. Cabral, J. Keim, R. Engelmann, R. Kraemer, J. Siebert, A. Bonn                                                  | Ecosystem services of allotment and community gardens: A Leipzig, Germany case study                                                                                   | Urban Forestry and Urban Greening         | 23     | 44-53   | 2017 |
| I. Zwierzchowska, A. Hof, C.I. Ioja, C. Mueller, L. Ponizy, J. Breuste, A. Mizgajski                               | Multi-Scale Assessment of Cultural Ecosystem Services of Parks in Central European Cities                                                                              | Urban Forestry and Urban Greening         | 30     | 84-97   | 2018 |
| J. Arnold, J. Kleemann, C. Fürst                                                                                   | A Differentiated Spatial Assessment of Urban Ecosystem Services Based on Land Use Data in Halle, Germany                                                               | land                                      | 7 (3)  | 1-29    | 2018 |
| J. Sieber, M. Pons                                                                                                 | Assessment of Urban Ecosystem Services using Ecosystem Services Reviews and GIS-based Tools                                                                            | Procedia Engineering                      | 115    | 53-60   | 2015 |
| J. De Valck, A. Beames, I. Liekens, M. Bettens, P. Seuntjens, S. Broekx                                            | Valuing urban ecosystem services in sustainable brownfield redevelopment                                                                                               | Ecosystem Services                        | 35     | 139-149 | 2019 |
| J. Maes, G. Zulian, S. Günther, M. Thijssen, J. Raynal                                                             | Enhancing Resilience Of Urban Ecosystems through Green Infrastructure (EnRoute) - Final Report                                                                         | Publications Office of the European Union |        |         | 2019 |
| J. Vieira, P. Matos, T. Mexia, P. Silva, N. Lopes, C. Freitas, O. Correia, M. Santos-Reis, C. Branquinho, P. Pinho | Green spaces are not all the same for the provision of air purification and climate regulation services: The case of urban parks                                       | Environmental Research                    | 160    | 306-313 | 2018 |
| J. Langemeyer, M. Camps-Calvet, L. Calvet-Mir, S. Barthel, E. Gómez-Baggethun                                      | Stewardship of urban ecosystem services: understanding the value(s) of urban gardens in Barcelona                                                                      | Landscape and Urban Planning              | 170    | 79-89   | 2018 |
| J. Mathey, S. Rößler, J. Banse, I. Lehmann, A. Bräuer                                                              | Brownfields As an Element of Green Infrastructure for Implementing Ecosystem Services into Urban Areas                                                                 | Journal of Urban Planning and Development | 141(3) |         | 2015 |
| J. Meri, L. Lian                                                                                                   | A mixed methods approach to urban ecosystem services: Experienced environmental quality and its role in ecosystem assessment within an inner-city estate               | Landscape and Urban Planning              | 161    | 10-21   | 2017 |

|                                                                                                                                                                                                                                                    |                                                                                                                                                          |                                                     |               |         |      |
|----------------------------------------------------------------------------------------------------------------------------------------------------------------------------------------------------------------------------------------------------|----------------------------------------------------------------------------------------------------------------------------------------------------------|-----------------------------------------------------|---------------|---------|------|
| K. Yua, M. Van Geel, T. Ceulemans, W. Geerts, M.M. Ramos, N. Sousa, P.M.L. Castro, P. Kastendeuch, G. Najjar, T. Ameglio, J. Ngao, M. Saudreau, O. Honnay, B. Somers                                                                               | Foliar optical traits indicate that sealed planting conditions negatively affect urban tree health                                                       | Ecological Indicators                               | 95            | 895-906 | 2018 |
| K.G. Radford, P. James                                                                                                                                                                                                                             | Changes in the value of ecosystem services along a rural–urban gradient: A case study of Greater Manchester, UK                                          | Landscape and Urban Planning                        | 109           | 117-127 | 2013 |
| K. Grönmeier, S.-M. Hönig, I. Jentsch, S. Leib, J. Loskyll, C. Mayer, S. Rothardt, J. Seimetz, S. Tweraser, F. Villinger, G. Waldenmeyer, S. Norra                                                                                                 | Assessment of Ecosystem Services in Urban Systems for the Example of Karlsruhe                                                                           | Urban Environment                                   |               | 133-142 | 2013 |
| K. Hubacek                                                                                                                                                                                                                                         | A GIS-based mapping methodology of urban green roof ecosystem services applied to a Central European city                                                | Urban Forestry and Urban Greening                   | 22            | 54-63   | 2017 |
| P. Kremer, Z. A. Hamstead, T. McPhearson                                                                                                                                                                                                           | The value of urban ecosystem services in New York City: A spatially explicit multicriteria analysis of landscape scale valuation scenarios               | Environmental Science and Policy                    | 62            | 57-68   | 2016 |
| N. Larondelle, S. Lauf                                                                                                                                                                                                                             | Balancing demand and supply of multiple urban ecosystem services on different spatial scales                                                             | Ecosystem Services                                  | 22            | 18-31   | 2016 |
| I. Lehmann, J. Mathey, S. Rößler, A. Bräuer, V. Goldberg                                                                                                                                                                                           | Urban vegetation structure types as a methodological approach for identifying ecosystem services - Application to the analysis of micro-climatic effects | Ecological Indicators                               | 42            | 58-72   | 2014 |
| L. Szücs, U. Anders, R. Bürger-Arndt                                                                                                                                                                                                               | Assessment and illustration of cultural ecosystem services at the local scale – A retrospective trend analysis                                           | Ecological Indicators                               | 50            | 120-134 | 2015 |
| L. Inostroza                                                                                                                                                                                                                                       | Open spaces and urban ecosystem services. Cooling effect towards urban planning in South American cities                                                 | TeMA, Journal of Land Use, Mobility and Environment | Special issue | 523-534 | 2014 |
| Maes J, Zulian G, Thijssen M, Castell C, Baró F, Ferreira AM, Melo J, Garrett CP, David N, Alzetta C, Geneletti D; Cortinovis C, Zwierzchowska I, Louro Alves F, Souto Cruz C, Blasi C, Alós Ortí MM, Attorre F, Azzella MM, Capotorti G, Copiz R, | Mapping and Assessment of Ecosystems and their Services. Urban Ecosystems.                                                                               | Publications Office of the European Union           |               |         | 2016 |

|                                                                                                                                                                                                                                                                                        |                                                                                                                                                                                  |                                   |     |                 |      |
|----------------------------------------------------------------------------------------------------------------------------------------------------------------------------------------------------------------------------------------------------------------------------------------|----------------------------------------------------------------------------------------------------------------------------------------------------------------------------------|-----------------------------------|-----|-----------------|------|
| Fusaro L, Manes F, Marando F, Marchetti M, Mollo B, Salvatori E, Zavattoni L, Zingari PC, Giarratano MC, Bianchi E, Duprè E, Barton D, Stange E, Perez-Soba M, van Eupen M, Verweij P, de Vries A, Kruse H, Polce C, Cugny-Seguin M, Erhard M, Nicolau R, Fonseca A, Fritz M, Teller A |                                                                                                                                                                                  |                                   |     |                 |      |
| M. Riechers, J. Barkmann, T. Tschardtke                                                                                                                                                                                                                                                | Diverging perceptions by social groups on cultural ecosystem services provided by urban green                                                                                    | Landscape and Urban Planning      | 175 | 161-168         | 2018 |
| M. Johansson, E. Pedersen, S. Weisner                                                                                                                                                                                                                                                  | Assessing cultural ecosystem services as individuals' place-based appraisals                                                                                                     | Urban Forestry and Urban Greening | 39  | 79-88           | 2019 |
| M.S. Orta Ortiz, D. Geneletti                                                                                                                                                                                                                                                          | Assessing Mismatches in the Provision of Urban Ecosystem Services to Support Spatial Planning: A Case Study on Recreation and Food Supply in Havana, Cuba                        | Sustainability                    | 10  | Article Nr 2165 | 2018 |
| M.S. Graça, P. Alvesa, J. Gonçalves, D.J. Nowak, R. Hoehn, P. Farinha-Marques, M. Cunhab                                                                                                                                                                                               | Assessing how green space types affect ecosystem services delivery in Porto, Portugal                                                                                            | Landscape and Urban Planning      | 170 | 195-208         | 2018 |
| M.S. Graça, J.F. Gonçalves, P.J.M. Alves, D.J. Nowak, R. Hoehn, A. Ellis, P. Farinha-Marques, M. Cunha                                                                                                                                                                                 | Assessing mismatches in ecosystem services proficiency across the urban fabric of Porto (Portugal): The influence of structural and socioeconomic variables                      | Ecosystem Services                | 23  | 82-93           | 2017 |
| M. Kiss, Á. Takács, R. Pogácsás, Á. Gulyás                                                                                                                                                                                                                                             | The role of ecosystem services in climate and air quality in urban areas: Evaluating carbon sequestration and air pollution removal by street and park trees in Szeged (Hungary) | Moravian Geographical Reports     | 23  | 36-46           | 2015 |
| M.W. Strohbach, D. Haase                                                                                                                                                                                                                                                               | Above-ground carbon storage by urban trees in Leipzig, Germany: Analysis of patterns in a European city                                                                          | Landscape and Urban Planning      | 104 | 95-104          | 2012 |
| N. Nikodinoska, A. Paletto, F. Pastorella, M. Granvik, P.P. Franzese                                                                                                                                                                                                                   | Assessing, valuing and mapping ecosystem services at city level: The case of Uppsala (Sweden)                                                                                    | Ecological Modelling              | 368 | 411-424         | 2018 |
| N. Larondelle, D. Haase                                                                                                                                                                                                                                                                | Urban ecosystem services assessment along a rural-urban gradient: A cross-analysis of European cities                                                                            | Ecological Indicators             | 29  | 179-190         | 2013 |
| Oppla                                                                                                                                                                                                                                                                                  | Oslo BiodiverCity - Maintaining ecosystem services in a rapidly developing but biodiversity rich city                                                                            | Oppla Webpage                     |     |                 | 2018 |

|                                                                                                                                 |                                                                                                                                                 |                                    |            |                 |       |
|---------------------------------------------------------------------------------------------------------------------------------|-------------------------------------------------------------------------------------------------------------------------------------------------|------------------------------------|------------|-----------------|-------|
| Oppla                                                                                                                           | Mapping and assessing ecosystem services to support urban planning in Trento                                                                    | Oppla Webpage                      |            |                 | 2018  |
| Oppla                                                                                                                           | Assessing urban ecosystem services provided by urban trees in Strasbourg City                                                                   | Oppla Webpage                      |            |                 | 2013  |
| P.C. Sutton, S.J. Anderson                                                                                                      | Holistic valuation of urban ecosystem services in New York City's Central Park                                                                  | Ecosystem Services                 | 19         | 87-91           | 2016  |
| P. Czembrowski, J. Kronenberg, M. Czepkiewicz                                                                                   | Integrating non-monetary and monetary valuation methods – SoftGIS and hedonic pricing                                                           | Ecological Economics               | 130        | 166-175         | 2016  |
| R. Giedych, G. Maksymiuk                                                                                                        | Specific Features of Parks and Their Impact on Regulation and Cultural Ecosystem Services Provision in Warsaw, Poland                           | Sustainability                     | 9          | Article No. 792 | 2017  |
| D.R. Richards, B. Tunçer,                                                                                                       | Using image recognition to automate assessment of cultural ecosystem services from social media photographs                                     | Ecosystem Services                 | 31, Part C | 318-325         | 2018  |
| R. Mendonça De Carvalho, C.F. Szlafsztein                                                                                       | Urban vegetation loss and ecosystem services: The influence on climate regulation and noise and air pollution                                   | Environmental pollution            | 245        | 844-852         | 2019  |
| S. Sacchelli, S. Fabbrizzi, F. Geri, M. Ciolli                                                                                  | Place-Based Policy-Making and Community Security: A Decision Support System for Integrated Planning of Urban Ecosystem Services and Disservices | Green energy and technology        |            | 95-104          | 43191 |
| S. Tresch, M. Moretti, R.-C. Le Bayon, P. Mäder, A. Zanetta, D. Frey, A. Fliessbach                                             | A Gardener's Influence on Urban Soil Quality                                                                                                    | Frontiers in Environmental Science | 6          | (article 25)    | 2018  |
| S. Zhang, F. Muñoz Ramírez                                                                                                      | Assessing and mapping ecosystem services to support urban green infrastructure: The case of Barcelona, Spain                                    | Cities                             | 92         | 59-70           | 2019  |
| S. Buchel, N. Frantzeskaki                                                                                                      | Citizens' voice: A case study about perceived ecosystem services by urban park users in Rotterdam, the Netherlands                              | Ecosystem Services                 | 12         | 169-177         | 2015  |
| TEEB – The Economics of Ecosystems and Biodiversity                                                                             | TEEB Manual for Cities: Ecosystem Services in Urban Management.                                                                                 |                                    |            |                 | 2011  |
| T. Mexia, J. Vieira, A. Príncipe, A. Anjos, P. Silva, N. Lopes, C. Freitas, M. Santos-Reis, O. Correia, C. Branquinho, P. Pinho | Ecosystem services: Urban parks under a magnifying glass                                                                                        | Environmental Research             | 160        | 469-478         | 2018  |
| The URBES Project                                                                                                               | URBES Factsheet no. 3                                                                                                                           |                                    |            |                 | 2013  |

|                                                                                                                                                                   |                                                                                                                                                                           |                                |       |                   |      |
|-------------------------------------------------------------------------------------------------------------------------------------------------------------------|---------------------------------------------------------------------------------------------------------------------------------------------------------------------------|--------------------------------|-------|-------------------|------|
| T. Hu, J. Chang, X. Xu<br>Liu, S. Feng                                                                                                                            | Integrated methods for determining restoration priorities of coal mining subsidence areas based on green infrastructure: –A case study in the Xuzhou urban area, of China | Ecological Indicators          | 94(2) | 164-174           | 2018 |
| V.A. Parsa, E. Salehi, A.R. Yavari, P.M. van Bodegom                                                                                                              | Analyzing temporal changes in urban forest structure and the effect on air quality improvement                                                                            | Sustainable Cities and Society | 48    | Article NR 101548 | 2019 |
| V. Pappalardo, D. La Rosa, A. Campisano, P. La Greca                                                                                                              | The potential of green infrastructure application in urban runoff control for land use planning: A preliminary evaluation from a southern Italy case study                | Ecosystem Services             | 26    | 345-354           | 2017 |
| Y. Andersson-Sköld, J. Klingberg, B. Gunnarsson, K. Cullinane, I. Gustafsson, M. Hedblom, I. Knez, F. Lindberg, Å. Ode Sang, H. Pleijel, P. Thorsson, S. Thorsson | A framework for assessing urban greenery's effects and valuing its ecosystem services                                                                                     | Environmental Management       | 205   | 274-285           | 2018 |
| Z. Wu, Y. Zhang                                                                                                                                                   | Water Bodies' Cooling Effects on Urban Land Daytime Surface Temperature: Ecosystem Service Reducing Heat Island Effect                                                    | Sustainability                 | 11    |                   | 2019 |
| Z.G. Davies, M. Dallimer, J.L. Edmondson, J. R. Leake, K.J. Gaston                                                                                                | Identifying potential sources of variability between vegetation carbon storage estimates for urban areas                                                                  | Environmental pollution        | 183   | 133-142           | 2013 |

4

5

## 6 S2. Short descriptions of method categories

| Method categories                      | Description (cf. MAES-Explorer with own modifications)                                                                                                                                                                                            |
|----------------------------------------|---------------------------------------------------------------------------------------------------------------------------------------------------------------------------------------------------------------------------------------------------|
| Spatial Proxy methods                  | Spatial proxy methods are derived from indirect measurements which deliver a biophysical value in physical units, e.g., extrapolation from land use data to ES supply capacities.                                                                 |
| Sampling/ Field mapping + observations | Collecting physical samples or making field observations / field mappings in the nature and taking direct measurements (based on physical units), e.g., botanical surveys.                                                                        |
| Surveys + questionnaires               | Questioning and surveying people (experts, laypersons), e.g., expert interviews. This method can provide expert information on ecosystem services, but it can be also used to evaluate uncertainties of other methodologies.                      |
| Economic valuation methods             | Valuation of ES with monetary units, e.g., market price or public pricing.                                                                                                                                                                        |
| Model-based methods                    | This group includes modelling tools that are used for ecosystem services modelling and mapping and that can assess tradeoffs and scenarios for multiple services, e.g., i-Tree Eco model.                                                         |
| Social media-based methods             | Methods that use data from social networks or smartphone applications for ES-assessments. This method can reveal preferences for ES and give spatially explicit data on location for nearby ES provision, e.g., Geo-tagged photo-series analysis. |
| Remote sensing + earth observations    | Assessments of ES with datasets (e.g., Optical, radar and LiDAR data) and indicators that are derived from Satellite Earth observation as well as airborne and drone observations.                                                                |

7

8

S3. Overview of assessed ES sections and classes according to CICES V5.1 in regard to urban green infrastructures. Note: Articles which lack specifications on the considered ES class are assigned to the ES class “in general, specifications missing” in each ES section.

| ES section                      | ES class                                                                                                                                           | Number |
|---------------------------------|----------------------------------------------------------------------------------------------------------------------------------------------------|--------|
| Provisioning (12)               | Cultivated terrestrial plants (including fungi, algae) grown for nutritional purposes                                                              | 14     |
|                                 | Fibres and other materials from cultivated plants, fungi, algae and bacteria for direct use or processing (excluding genetic materials)            | 4      |
|                                 | Cultivated plants (including fungi, algae) grown as a source of energy                                                                             | 2      |
|                                 | Animals reared for nutritional purposes                                                                                                            | 2      |
|                                 | Fibres and other materials from reared animals for direct use or processing (excluding genetic materials)                                          | 2      |
|                                 | Wild plants (terrestrial and aquatic, including fungi, algae) used for nutrition                                                                   | 2      |
|                                 | Fibres and other materials from wild plants for direct use or processing (excluding genetic materials)                                             | 1      |
|                                 | Wild animals (terrestrial and aquatic) used for nutritional purposes                                                                               | 1      |
|                                 | Fibres and other materials from wild animals for direct use or processing (excluding genetic materials)                                            | 2      |
|                                 | Surface water for drinking                                                                                                                         | 1      |
|                                 | Surface water used as a material (non-drinking purposes)                                                                                           | 2      |
|                                 | Ground (and subsurface) water for drinking                                                                                                         | 9      |
| Regulation and Maintenance (16) | <i>Provisioning services (in general, specifications missing)</i>                                                                                  | 4      |
|                                 | Filtration/sequestration/storage/accumulation by micro-organisms, algae, plants, and animals                                                       | 23     |
|                                 | Noise attenuation                                                                                                                                  | 1      |
|                                 | Control of erosion rates                                                                                                                           | 1      |
|                                 | Hydrological cycle and water flow regulation (Including flood control, and coastal protection)                                                     | 10     |
|                                 | Wind protection                                                                                                                                    | 3      |
|                                 | Fire protection                                                                                                                                    | 21     |
|                                 | Pollination (or 'gamete' dispersal in a marine context)                                                                                            | 1      |
|                                 | Seed dispersal                                                                                                                                     | 1      |
|                                 | Maintaining nursery populations and habitats (Including gene pool protection)                                                                      | 1      |
|                                 | Pest control (including invasive species)                                                                                                          | 7      |
|                                 | Disease control                                                                                                                                    | 4      |
|                                 | Weathering processes and their effect on soil quality                                                                                              | 5      |
|                                 | Decomposition and fixing processes and their effect on soil quality                                                                                | 39     |
|                                 | Regulation of the chemical condition of freshwaters by living processes                                                                            | 2      |
|                                 | Regulation of chemical composition of atmosphere and oceans                                                                                        | 30     |
|                                 | Regulation of temperature and humidity, including ventilation and transpiration                                                                    | 7      |
|                                 | <i>Regulation and maintenance services (in general, specifications missing)</i>                                                                    | 5      |
| Cultural (9)                    | Characteristics of living systems that enable activities promoting health, recuperation or enjoyment through active or immersive interactions      | 7      |
|                                 | Characteristics of living systems that enable activities promoting health, recuperation or enjoyment through passive or observational interactions | 14     |
|                                 | Characteristics of living systems that enable scientific investigation or the creation of traditional ecological knowledge                         | 5      |
|                                 | Characteristics of living systems that enable education and training                                                                               | 6      |
|                                 | Characteristics of living systems that are resonant in terms of culture or heritage                                                                | 4      |
|                                 | Characteristics of living systems that enable aesthetic experiences                                                                                | 10     |
|                                 | Elements of living systems that have sacred or religious meaning                                                                                   | 5      |
|                                 | Elements of living systems used for entertainment or representation                                                                                | 6      |
|                                 | Other (Communication and interaction with other people)                                                                                            | 4      |
|                                 | <i>Cultural services (in general, specifications missing)</i>                                                                                      | 10     |
